# Supplementary material for: Evaluation of planarity and aromaticity in sapphyrin and inverted sapphyrin using a bidirectional NICS (Nucleus-Independent Chemical Shift) scan method
Source: Royal Society of Chemistry journal article supplement (doi:10.1039/b618674b), 2007-01-01
Supplement: b618674b.pdf [file b618674b.pdf]

## Supporting Information

# Evaluation of Planarity and Aromaticity in Sapphyrin and Inverted Sapphyrin Using a Bidirectional NICS (Nucleus- Independent Chemical Shift) Scan Method

Zin Seok Yoon,<sup>1</sup> Su Bum Noh,<sup>1</sup> Dong-Gyu Cho,<sup>2</sup>

Jonathan L. Sessler,<sup>2,\*</sup> and Dongho Kim<sup>1,\*</sup>

*<sup>1</sup>Department of Chemistry, Yonsei University, Seoul 120-749, Korea*

*<sup>2</sup>Department of Chemistry and Biochemistry, 1 University Station – A5300,*

*The University of Texas at Austin, Austin, Texas 78712-0165, USA*

\*To whom it may correspondence should be addressed.

E-mail: dongho@yonsei.ac.kr; sessler@mail.utexas.edu

## Contents

|                                                                                                        | Page  |
|--------------------------------------------------------------------------------------------------------|-------|
| Experimental section.....                                                                              | 3-6   |
| Fluorescence lifetime measurements for Sap .....                                                       | 7     |
| Femtosecond transient absorption decay profiles of Sap and InSap.....                                  | 8     |
| Open-aperture femtosecond Z-scan curves of Sap and InSap.....                                          | 9     |
| NICS scan for pentapyrrolic systems (pentaphyrin, orangarin, smaragdyrin,<br>and isosmaragdyrin) ..... | 10    |
| Optimized XYZ coordination in Sap and InSap using B3LYP/6-311+G* for NICS<br>calculation.....          | 11-22 |

## **Experimental Section**

**Steady-state absorption and emission.** Steady-state absorption spectra were acquired using an UV-VIS-NIR spectrometer (Varian, Cary5000). Steady-state fluorescence spectra were recorded on a fluorescence spectrometer (Hitachi, FL2500). For the observation of near-infrared (NIR) emission spectra, a photomultiplier (Hamamatsu, R5108), a lock-in amplifier (EG&G, 5210), combined with a chopper after laser excitation at 442 nm from a CW He-Cd laser (Melles Griot, Omnicrome 74) were used.

**Time-correlated Single Photon Counting.** Time-resolved fluorescence was detected using a time-correlated single-photon-counting (TCSPC) technique. A home-made cavity dumped Ti:Sapphire oscillator pumped by a CW Nd:YVO<sub>4</sub> laser (Coherent, Verdi) was used as the excitation light source; this provided ultrashort pulses (100 fs at full width half maximum) and allowed for a high repetition rate (200 ~ 400 kHz). The output pulse of the oscillator was frequency-doubled with a second harmonic crystal. The TCSPC detection system consisted of a multichannel plate photomultiplier (Hamamatsu, R3809U-51) with a cooler (Hamamatsu, C4878), a TAC (time-to-amplitude converter) (EG&G Ortec, 457), two discriminators (EG&G Ortec, 584 (signal) and Canberra, 2126 (trigger)), and two wideband amplifiers (Philip Scientific (signal) and a Mini Circuit (trigger)). A personal computer with a multichannel analyzer (Canberra, PCA3) was used for data storage and processing. The overall instrumental response function was about 60 ps

(fwhm). A sheet polarizer, set at an angle complementary to the magic angle (54.7°), was placed in the fluorescence collection system. The decay fittings were determined using a least-squares deconvolution process (LIFETIME program with an iterative nonlinear least-squares deconvolution procedure developed at the University of Pennsylvania).

**Femtosecond Transient Absorption.** Measurements were made using a set-up involving a dual-beam femtosecond time-resolved transient absorption spectrometer consisting of two independently-tunable home-made optical parametric amplifiers (OPA) pumped by a Ti:sapphire regenerative amplifier system (Spectra-Physics, Hurricane X) operating at 5 kHz repetition rate and an optical detection system. The OPA were based on non-collinearly phase-matching geometry and easily color-tuned by controlling the delay between the white light continuum pulses and pump pulses. The generated visible OPA pulses had a pulse width of ~35 fs and an average power of 10 mW at 5 kHz repetition rate in the range 500-700 nm. The probe beam was split into two parts. One part of the probe beam was configured to overlap with the pump beam at the sample to monitor the transient (signal), while the other part of the probe beam was passed through the sample without overlapping the pump beam to compensate the fluctuation in the probe beam (reference). The time delay between the pump and probe beams was carefully controlled by making the pump beam travel along a variable optical delay (Newport, ILS250). To obtain the time-resolved transient absorption difference signal at specific wavelength, the monitoring wavelength was selected by using an interference

filter. By chopping the pump pulses at 47 Hz, the modulated probe pulses as well as the reference pulses could be detected by two separate photodiodes. The modulated signals of the probe pulses were measured by a gated-integrator (SRS, SR250) and a lock-in amplifier (EG&G, DSP7265) and stored in a personal computer for further signal processing. The polarization angle between the pump and probe beams was set to the magic angle ( $54.7^\circ$ ) in order to obviate polarization-dependent signals.

**Two-photon Absorption Cross-Section ( $\sigma^{(2)}$ ).** The TPA experiments were performed using the open-aperture Z-scan method with 130 fs pulses from an optical parametric amplifier (Light Conversion, TOPAS) operating at a 5 kHz repetition rate using a Ti:sapphire regenerative amplifier system (Spectra-Physics, Hurricane). The laser beam was divided into two parts. One was monitored by a Ge/PN photodiode (New Focus) as intensity reference, and the other was used for the transmittance studies. After passing through an  $f = 10$  cm lens, the laser beam was focused and passed through a quartz cell. The position of the sample cell could be varied along the laser-beam direction (z-axis), so the local power density within the sample cell could be changed under a constant laser power level. The thickness of the cell was 1 mm. The transmitted laser beam from the sample cell was then probed using the same photodiode as used for reference monitoring. The on-axis peak intensity of the incident pulses at the focal point,  $I_0$ , ranged from 40 to 60 GW/cm. Assuming a Gaussian beam profile, the nonlinear absorption coefficient  $\beta$  can be obtained by curve fitting to the observed open aperture traces with the following

equation:

$$T(z) = 1 - \frac{\beta I_0 (1 - e^{-\alpha_0 l})}{2\alpha_0 (1 + (z/z_0)^2)},$$

where  $\alpha_0$  is the linear absorption coefficient,  $l$  the sample length, and  $z_0$  the diffraction length of the incident beam. After obtaining the nonlinear absorption coefficient  $\beta$ , the TPA cross-section  $\sigma^{(2)}$  (in units of 1 GM =  $10^{50}$  cm<sup>4</sup>·s/photon·molecule) of a single solute molecule sample can be determined by using the following relationship:

$$\beta = \frac{\delta N_A d \times 10^{-3}}{h\nu},$$

where  $N_A$  is the Avogadro constant,  $d$  the concentration of the TPA compound in solution,  $h$  is Planck's constant, and  $\nu$  is the frequency of the incident laser beam. So as to satisfy the condition of  $\alpha_0 l \ll 1$ , which allows the pure TPA  $\sigma^{(2)}$  values to be determined using a simulation procedure, the TPA cross-section value of AF-50 was measured as a reference compound; this control was found to exhibit a TPA value of 50 GM at 800 nm.

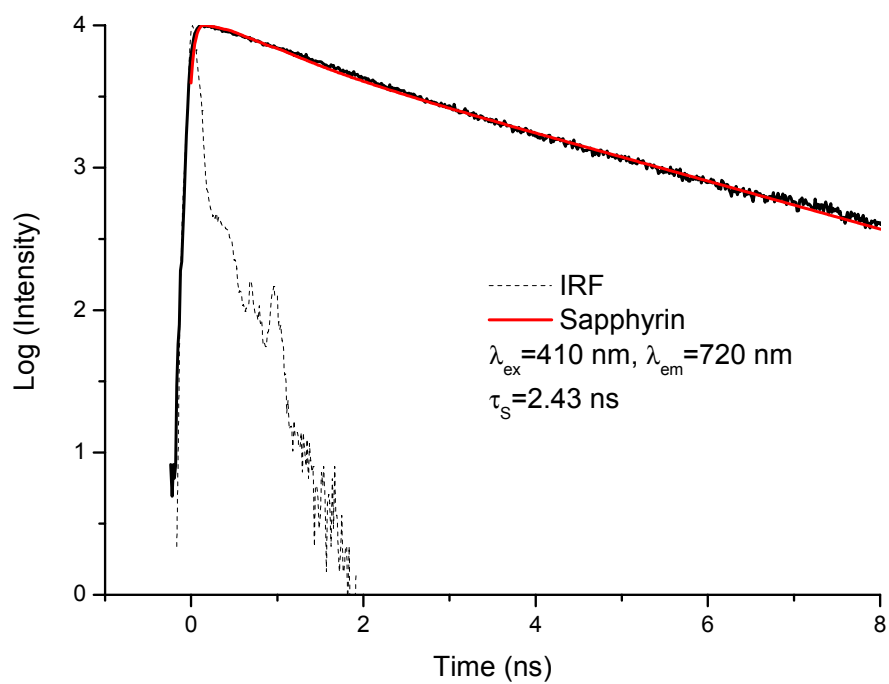

**Figure S1.**  $S_1$ -state fluorescence decay profile of Sap in  $\text{CH}_2\text{Cl}_2$  measured by time-correlated single photon counting (TCSPC) method. The time-resolved fluorescence was monitored at 720 nm, after excitation at 410 nm.

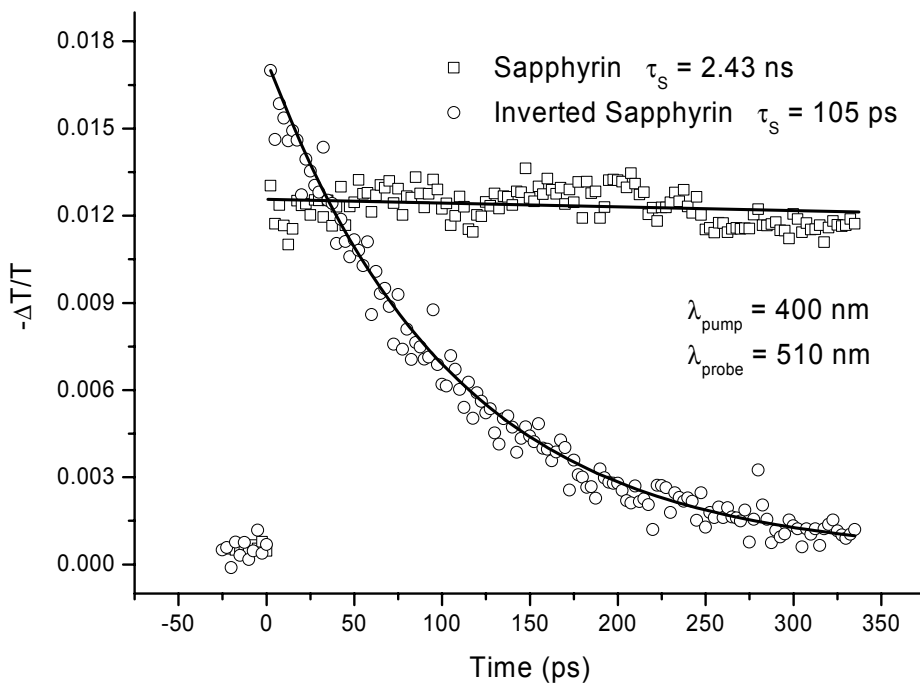

**Figure S2.** S<sub>1</sub>-state decay profiles of sapphyrin (Sap) and inverted sapphyrin (InSap) in CH<sub>2</sub>Cl<sub>2</sub> measured by femtosecond transient absorption spectroscopy, where the pump and the probe wavelengths are 400 and 510 nm, respectively. This was true for both samples.



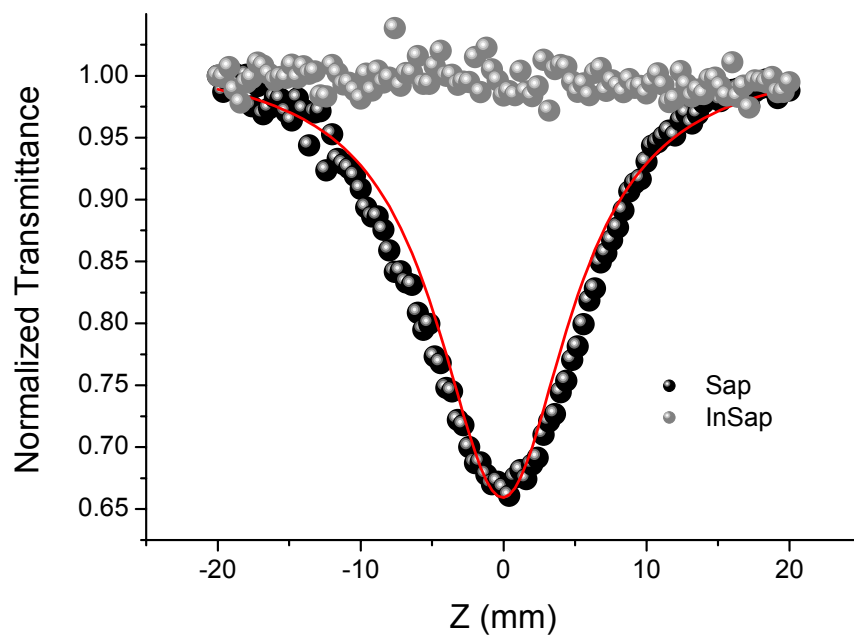

**Figure S3.** Open-aperture femtosecond Z-scan traces for Sap and InSap as recorded in  $\text{CH}_2\text{Cl}_2$ . The sample concentrations are 0.10 mM. The peak irradiance at the focal point is  $80 \text{ GW}/\text{cm}^2$ . The solid line for Sap is the best-fit curve for the experimental data under conditions of excitation at 1220 nm. The two-photon absorption coefficient of InSap could not be measured.

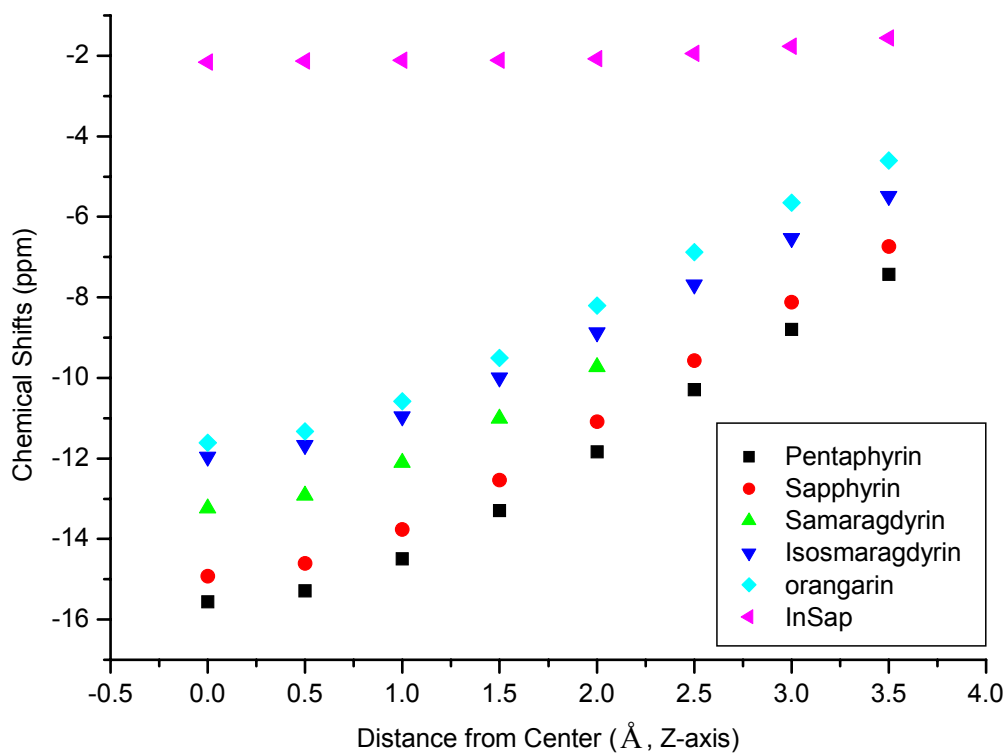

**Figure S4.** Isotropic chemical shifts for six pentapyrrolic systems; pentaphyrin, sapphyrin, smaragdyrin, isosmaragdyrin, orangarin, and inverted sapphyrin.

Optimized XYZ coordination in Sap using B3LYP/6-311+G\* for NICS  
calculation:

Symbolic Z-matrix:

Charge = 0 Multiplicity = 1

|   |          |          |          |
|---|----------|----------|----------|
| N | 0.01543  | 0.00462  | -0.01061 |
| N | 0.02635  | -0.0042  | 2.9168   |
| N | 3.37928  | -0.00634 | 3.59586  |
| N | 5.01638  | 0.00363  | 0.59288  |
| N | 2.78166  | 0.00953  | -1.2996  |
| C | -1.34833 | 0.00405  | 0.19245  |
| C | 0.29553  | 0.00918  | -1.35401 |
| C | -1.95432 | 0.00819  | -1.09004 |
| C | -0.95146 | 0.01131  | -2.03423 |
| C | 0.1571   | -0.00844 | 4.26641  |
| C | -1.32857 | -0.00355 | 2.68791  |
| C | -1.14758 | -0.01023 | 4.9224   |
| C | -2.07214 | -0.00738 | 3.93641  |
| C | 2.68172  | -0.01018 | 4.7904   |
| C | 4.74253  | -0.00725 | 3.83056  |
| C | 3.66934  | -0.01365 | 5.83061  |
| C | 4.9032   | -0.01193 | 5.25587  |
| C | 5.71221  | 0.00814  | -0.59209 |
| C | 5.96581  | 0.00041  | 1.56084  |
| C | 7.14649  | 0.00748  | -0.3586  |

|   |          |          |          |
|---|----------|----------|----------|
| C | 7.3071   | 0.00267  | 0.98349  |
| C | 1.57284  | 0.01161  | -1.94923 |
| C | 3.81445  | 0.01346  | -2.21297 |
| C | 1.85423  | 0.017    | -3.34146 |
| C | 3.22226  | 0.01818  | -3.5019  |
| C | -1.95618 | 0.00019  | 1.44698  |
| C | 1.32042  | -0.01097 | 5.05307  |
| C | 5.8196   | -0.00445 | 2.95754  |
| C | 5.16586  | 0.01268  | -1.87091 |
| H | -3.02004 | 0.00872  | -1.2672  |
| H | -1.07054 | 0.01473  | -3.1069  |
| H | -1.30793 | -0.0134  | 5.99242  |
| H | -3.15047 | -0.00765 | 4.0242   |
| H | 5.86373  | -0.01364 | 5.75071  |
| H | 3.43032  | -0.01706 | 6.88436  |
| H | 7.90736  | 0.01037  | -1.12774 |
| H | 8.22973  | 0.00079  | 1.54864  |
| H | 1.10957  | 0.01971  | -4.12263 |
| H | 3.77204  | 0.022    | -4.4319  |
| H | -3.04111 | 0.00021  | 1.4464   |
| H | 1.11426  | -0.01434 | 6.11933  |
| H | 6.76837  | -0.0063  | 3.48598  |
| H | 5.86361  | 0.01598  | -2.70173 |
| H | 2.98822  | 0.00587  | -0.30578 |

|    |         |          |         |
|----|---------|----------|---------|
| H  | 0.64352 | 0.0023   | 0.78685 |
| H  | 2.95424 | -0.00327 | 2.68289 |
| Bq | 2.27535 | 4.00208  | 1.23928 |
| Bq | 2.27528 | 3.90208  | 1.23948 |
| Bq | 2.27522 | 3.80208  | 1.23968 |
| Bq | 2.27515 | 3.70208  | 1.23989 |
| Bq | 2.27509 | 3.60208  | 1.24009 |
| Bq | 2.27502 | 3.50208  | 1.24029 |
| Bq | 2.27496 | 3.40208  | 1.24049 |
| Bq | 2.27489 | 3.30208  | 1.24069 |
| Bq | 2.27482 | 3.20208  | 1.24089 |
| Bq | 2.27476 | 3.10208  | 1.2411  |
| Bq | 2.27469 | 3.00208  | 1.2413  |
| Bq | 2.27463 | 2.90208  | 1.2415  |
| Bq | 2.27456 | 2.80208  | 1.2417  |
| Bq | 2.27449 | 2.70208  | 1.2419  |
| Bq | 2.27443 | 2.60208  | 1.2421  |
| Bq | 2.27436 | 2.50208  | 1.24231 |
| Bq | 2.2743  | 2.40208  | 1.24251 |
| Bq | 2.27423 | 2.30208  | 1.24271 |
| Bq | 2.27417 | 2.20208  | 1.24291 |
| Bq | 2.2741  | 2.10208  | 1.24311 |
| Bq | 2.27403 | 2.00208  | 1.24331 |
| Bq | 2.27397 | 1.90208  | 1.24352 |

|    |         |          |         |
|----|---------|----------|---------|
| Bq | 2.2739  | 1.80208  | 1.24372 |
| Bq | 2.27384 | 1.70208  | 1.24392 |
| Bq | 2.27377 | 1.60208  | 1.24412 |
| Bq | 2.2737  | 1.50208  | 1.24432 |
| Bq | 2.27364 | 1.40208  | 1.24452 |
| Bq | 2.27357 | 1.30208  | 1.24473 |
| Bq | 2.27351 | 1.20208  | 1.24493 |
| Bq | 2.27344 | 1.10208  | 1.24513 |
| Bq | 2.27338 | 1.00208  | 1.24533 |
| Bq | 2.27331 | 0.90208  | 1.24553 |
| Bq | 2.27324 | 0.80208  | 1.24573 |
| Bq | 2.27318 | 0.70208  | 1.24594 |
| Bq | 2.27311 | 0.60208  | 1.24614 |
| Bq | 2.27305 | 0.50208  | 1.24634 |
| Bq | 2.27298 | 0.40208  | 1.24654 |
| Bq | 2.27291 | 0.30208  | 1.24674 |
| Bq | 2.27285 | 0.20208  | 1.24694 |
| Bq | 2.27278 | 0.10208  | 1.24715 |
| Bq | 2.27272 | 0.00208  | 1.24735 |
| Bq | 2.27265 | -0.09792 | 1.24755 |
| Bq | 2.27259 | -0.19792 | 1.24775 |
| Bq | 2.27252 | -0.29792 | 1.24795 |
| Bq | 2.27245 | -0.39792 | 1.24816 |
| Bq | 2.27239 | -0.49792 | 1.24836 |

|    |         |          |         |
|----|---------|----------|---------|
| Bq | 2.27232 | -0.59792 | 1.24856 |
| Bq | 2.27226 | -0.69792 | 1.24876 |
| Bq | 2.27219 | -0.79792 | 1.24896 |
| Bq | 2.27213 | -0.89792 | 1.24916 |
| Bq | 2.27206 | -0.99792 | 1.24937 |
| Bq | 2.27199 | -1.09792 | 1.24957 |
| Bq | 2.27193 | -1.19792 | 1.24977 |
| Bq | 2.27186 | -1.29792 | 1.24997 |
| Bq | 2.2718  | -1.39792 | 1.25017 |
| Bq | 2.27173 | -1.49792 | 1.25037 |
| Bq | 2.27166 | -1.59792 | 1.25058 |
| Bq | 2.2716  | -1.69792 | 1.25078 |
| Bq | 2.27153 | -1.79792 | 1.25098 |
| Bq | 2.27147 | -1.89792 | 1.25118 |
| Bq | 2.2714  | -1.99792 | 1.25138 |
| Bq | 2.27134 | -2.09792 | 1.25158 |
| Bq | 2.27127 | -2.19792 | 1.25179 |
| Bq | 2.2712  | -2.29792 | 1.25199 |
| Bq | 2.27114 | -2.39792 | 1.25219 |
| Bq | 2.27107 | -2.49792 | 1.25239 |
| Bq | 2.27101 | -2.59792 | 1.25259 |
| Bq | 2.27094 | -2.69792 | 1.25279 |
| Bq | 2.27087 | -2.79792 | 1.253   |
| Bq | 2.27081 | -2.89792 | 1.2532  |

|    |         |          |         |
|----|---------|----------|---------|
| Bq | 2.27074 | -2.99792 | 1.2534  |
| Bq | 2.27068 | -3.09792 | 1.2536  |
| Bq | 2.27061 | -3.19792 | 1.2538  |
| Bq | 2.27055 | -3.29792 | 1.254   |
| Bq | 2.27048 | -3.39792 | 1.25421 |
| Bq | 2.27041 | -3.49792 | 1.25441 |
| Bq | 2.27035 | -3.59792 | 1.25461 |
| Bq | 2.27028 | -3.69792 | 1.25481 |
| Bq | 2.27022 | -3.79792 | 1.25501 |
| Bq | 2.27015 | -3.89792 | 1.25521 |
| Bq | 2.27008 | -3.99792 | 1.25542 |
| Bq | 2.27002 | -4.09792 | 1.25562 |
| Bq | 2.26995 | -4.19792 | 1.25582 |
| Bq | 2.26989 | -4.29792 | 1.25602 |
| Bq | 2.26982 | -4.39792 | 1.25622 |
| Bq | 2.26976 | -4.49792 | 1.25642 |
| Bq | 2.26969 | -4.59792 | 1.25663 |
| Bq | 2.26962 | -4.69792 | 1.25683 |
| Bq | 2.26956 | -4.79792 | 1.25703 |
| Bq | 2.26949 | -4.89792 | 1.25723 |



Optimized XYZ coordination in InSap using B3LYP/6-311+G\* for NICS  
calculation:

Symbolic Z-matrix:

Charge = 0 Multiplicity = 1

|   |          |          |          |
|---|----------|----------|----------|
| C | -1.62596 | -1.98408 | -0.11966 |
| H | -1.21982 | -0.98615 | -0.12944 |
| C | -0.9604  | -3.15727 | -0.00574 |
| C | 0.47416  | -3.26415 | 0.07771  |
| C | 1.35142  | -2.18362 | -0.21995 |
| C | 2.65303  | -2.57249 | 0.05211  |
| N | 2.57566  | -3.89124 | 0.48491  |
| C | 1.27504  | -4.31407 | 0.51005  |
| C | 3.88287  | -1.84921 | -0.04584 |
| C | 3.97152  | -0.48624 | -0.14091 |
| N | 2.90728  | 0.42436  | -0.08429 |
| C | 3.38219  | 1.73646  | -0.14038 |
| C | 4.81083  | 1.62292  | -0.32092 |
| C | 5.16036  | 0.31086  | -0.32095 |
| C | 2.71032  | 2.9299   | -0.06146 |
| C | 1.35921  | 3.36082  | 0.06921  |
| N | 0.15539  | 2.67092  | 0.03859  |
| C | -0.90754 | 3.55369  | 0.16959  |
| C | -0.3472  | 4.83664  | 0.31573  |
| C | 1.03012  | 4.72022  | 0.25232  |

|   |          |          |          |
|---|----------|----------|----------|
| C | -2.3017  | 3.30842  | 0.142    |
| C | -3.09437 | 2.18731  | 0.03012  |
| N | -2.71355 | 0.86131  | -0.06836 |
| C | -3.85682 | 0.15909  | -0.13068 |
| C | -5.02587 | 1.04068  | -0.08748 |
| C | -4.54977 | 2.30055  | 0.01732  |
| C | -4.02914 | -1.25858 | -0.20298 |
| C | -3.04214 | -2.21099 | -0.18713 |
| N | -3.22894 | -3.58514 | -0.23034 |
| C | -1.96653 | -4.28577 | 0.01215  |
| H | 0.01385  | 1.69591  | -0.17464 |
| H | 2.04696  | 0.17524  | 0.37928  |
| H | -1.76758 | -5.0334  | -0.76549 |
| H | -4.09162 | -3.98455 | 0.10364  |
| H | -1.97288 | -4.81223 | 0.97866  |
| H | -5.10716 | 3.22613  | 0.08069  |
| H | -6.05748 | 0.71507  | -0.12673 |
| H | 1.75969  | 5.51302  | 0.33426  |
| H | -0.9234  | 5.74039  | 0.45248  |
| H | 6.1498   | -0.10413 | -0.45319 |
| H | 5.46558  | 2.47373  | -0.44896 |
| H | 1.01883  | -5.30312 | 0.85786  |
| H | 3.36013  | -4.42875 | 0.81576  |
| H | -5.06018 | -1.59969 | -0.25211 |

|    |          |          |          |
|----|----------|----------|----------|
| H  | -2.86444 | 4.2341   | 0.22954  |
| H  | 3.38313  | 3.78135  | -0.09818 |
| H  | 4.81591  | -2.40368 | -0.04812 |
| H  | 1.05805  | -1.26731 | -0.70409 |
| Bq | -0.02176 | -0.05379 | 3.9      |
| Bq | -0.02441 | -0.05192 | 3.80005  |
| Bq | -0.02707 | -0.05004 | 3.70011  |
| Bq | -0.02972 | -0.04816 | 3.60016  |
| Bq | -0.03238 | -0.04629 | 3.50021  |
| Bq | -0.03504 | -0.04441 | 3.40027  |
| Bq | -0.03769 | -0.04253 | 3.30032  |
| Bq | -0.04035 | -0.04065 | 3.20037  |
| Bq | -0.043   | -0.03878 | 3.10042  |
| Bq | -0.04566 | -0.0369  | 3.00048  |
| Bq | -0.04832 | -0.03502 | 2.90053  |
| Bq | -0.05097 | -0.03315 | 2.80058  |
| Bq | -0.05363 | -0.03127 | 2.70064  |
| Bq | -0.05628 | -0.02939 | 2.60069  |
| Bq | -0.05894 | -0.02752 | 2.50074  |
| Bq | -0.0616  | -0.02564 | 2.4008   |
| Bq | -0.06425 | -0.02376 | 2.30085  |
| Bq | -0.06691 | -0.02188 | 2.2009   |
| Bq | -0.06956 | -0.02001 | 2.10095  |
| Bq | -0.07222 | -0.01813 | 2.00101  |

|    |          |          |          |
|----|----------|----------|----------|
| Bq | -0.07488 | -0.01625 | 1.90106  |
| Bq | -0.07753 | -0.01438 | 1.80111  |
| Bq | -0.08019 | -0.0125  | 1.70117  |
| Bq | -0.08284 | -0.01062 | 1.60122  |
| Bq | -0.0855  | -0.00874 | 1.50127  |
| Bq | -0.08816 | -0.00687 | 1.40132  |
| Bq | -0.09081 | -0.00499 | 1.30138  |
| Bq | -0.09347 | -0.00311 | 1.20143  |
| Bq | -0.09612 | -0.00124 | 1.10148  |
| Bq | -0.09878 | 0.00064  | 1.00154  |
| Bq | -0.10144 | 0.00252  | 0.90159  |
| Bq | -0.10409 | 0.00439  | 0.80164  |
| Bq | -0.10675 | 0.00627  | 0.7017   |
| Bq | -0.1094  | 0.00815  | 0.60175  |
| Bq | -0.11206 | 0.01002  | 0.5018   |
| Bq | -0.11472 | 0.0119   | 0.40186  |
| Bq | -0.11737 | 0.01378  | 0.30191  |
| Bq | -0.12003 | 0.01566  | 0.20196  |
| Bq | -0.12268 | 0.01753  | 0.10201  |
| Bq | -0.12534 | 0.01941  | 0.00207  |
| Bq | -0.128   | 0.02129  | -0.09788 |
| Bq | -0.13065 | 0.02316  | -0.19783 |
| Bq | -0.13331 | 0.02504  | -0.29777 |
| Bq | -0.13596 | 0.02692  | -0.39772 |

|    |          |         |          |
|----|----------|---------|----------|
| Bq | -0.13862 | 0.0288  | -0.49767 |
| Bq | -0.14128 | 0.03067 | -0.59762 |
| Bq | -0.14393 | 0.03255 | -0.69756 |
| Bq | -0.14659 | 0.03443 | -0.79751 |
| Bq | -0.14924 | 0.0363  | -0.89746 |
| Bq | -0.1519  | 0.03818 | -0.9974  |
| Bq | -0.15456 | 0.04006 | -1.09735 |
| Bq | -0.15721 | 0.04193 | -1.1973  |
| Bq | -0.15987 | 0.04381 | -1.29724 |
| Bq | -0.16252 | 0.04569 | -1.39719 |
| Bq | -0.16518 | 0.04757 | -1.49714 |
| Bq | -0.16784 | 0.04944 | -1.59708 |
| Bq | -0.17049 | 0.05132 | -1.69703 |
| Bq | -0.17315 | 0.0532  | -1.79698 |
| Bq | -0.1758  | 0.05507 | -1.89693 |
| Bq | -0.17846 | 0.05695 | -1.99687 |
| Bq | -0.18112 | 0.05883 | -2.09682 |
| Bq | -0.18377 | 0.0607  | -2.19677 |
| Bq | -0.18643 | 0.06258 | -2.29671 |
| Bq | -0.18908 | 0.06446 | -2.39666 |
| Bq | -0.19174 | 0.06634 | -2.49661 |
| Bq | -0.1944  | 0.06821 | -2.59655 |
| Bq | -0.19705 | 0.07009 | -2.6965  |
| Bq | -0.19971 | 0.07197 | -2.79645 |

|    |          |         |          |
|----|----------|---------|----------|
| Bq | -0.20236 | 0.07384 | -2.8964  |
| Bq | -0.20502 | 0.07572 | -2.99634 |
| Bq | -0.20768 | 0.0776  | -3.09629 |
| Bq | -0.21033 | 0.07947 | -3.19624 |
| Bq | -0.21299 | 0.08135 | -3.29618 |
| Bq | -0.21564 | 0.08323 | -3.39613 |
| Bq | -0.2183  | 0.08511 | -3.49608 |
| Bq | -0.22096 | 0.08698 | -3.59603 |
| Bq | -0.22361 | 0.08886 | -3.69597 |
| Bq | -0.22627 | 0.09074 | -3.79592 |
| Bq | -0.22892 | 0.09261 | -3.89587 |
| Bq | -0.23158 | 0.09449 | -3.99581 |
| Bq | -0.23424 | 0.09637 | -4.09576 |
| Bq | -0.23689 | 0.09824 | -4.19571 |
| Bq | -0.23955 | 0.10012 | -4.29565 |
| Bq | -0.2422  | 0.102   | -4.3956  |
| Bq | -0.24486 | 0.10388 | -4.49555 |
| Bq | -0.24752 | 0.10575 | -4.59549 |
| Bq | -0.25017 | 0.10763 | -4.69544 |
| Bq | -0.25283 | 0.10951 | -4.79539 |
| Bq | -0.25548 | 0.11138 | -4.89534 |
